# Supplementary material for: DNA-damage related genes and clinical outcome in hormone receptor positive breast cancer
Source: PubMed Central journal article supplement (PMC5609884; doi:10.18632/oncotarget.10886), 2016-07-28
Supplement: oncotarget-08-62834-s001.pdf [file oncotarget-08-62834-s001.pdf]

## **DNA-damage related genes and clinical outcome in hormone receptor positive breast cancer**

### **SUPPLEMENTARY TABLES**

**Supplementary Table S1: Association of the identified genes with RFS in the different breast cancer subtypes using KM plotter**

See Supplementary File 1

**Supplementary Table S2: Association of the identified genes with OS in the different breast cancer subtypes using KM plotter**

See Supplementary File 2

**Supplementary Table S3: Biological function for the identified genes**

See Supplementary File 3
